# Supplementary material for: Meniran ( Phyllanthus niruri L.) embedded zeolitic imidazolate framework (ZIF-8) nanoparticle for cancer chemotherapy: supported molecular docking analysis
Source: Royal Society of Chemistry journal article supplement (doi:10.1039/d4ra06399f), 2025-01-01
Supplement: d4ra06399f1.pdf [file d4ra06399f1.pdf]

## SUPPORTING INFORMATION

### **Meniran (*Phyllanthus niruri* L) Embedded Zeolitic Imidazolate Framework (ZIF-8) Nanoparticle for Cancer Chemotherapy: Supported Molecular Docking Analysis**

Fasih Bintang Ilhami<sup>a\*</sup>, Sari Edi Cahyaningrum<sup>b</sup>, Andika Pramudya Wardana<sup>b</sup>, Noto Susanto

Gultom<sup>c</sup>, Hasan Subekti<sup>a</sup>, Astrid Rahmawati<sup>d</sup>, and Sapti Puspitarini<sup>a\*</sup>

- a. Department of Natural Science, Faculty of Mathematics and Natural Sciences, Universitas Negeri Surabaya, Surabaya 60231, Indonesia. Email: [fasihilhami@unesa.ac.id](mailto:fasihilhami@unesa.ac.id)  
[saptipuspitarini@unesa.ac.id](mailto:saptipuspitarini@unesa.ac.id)
- b. Department of Chemistry, Faculty of Mathematics and Natural Sciences, Universitas Negeri Surabaya, Surabaya 60231, Indonesia.
- c. Department of Physics, Universitas Padjadjaran, Bandung 45363, Indonesia.
- d. Department of Applied Chemistry, Osaka Institute of Technology, Osaka 535-8585, Japan.

\* Corresponding author

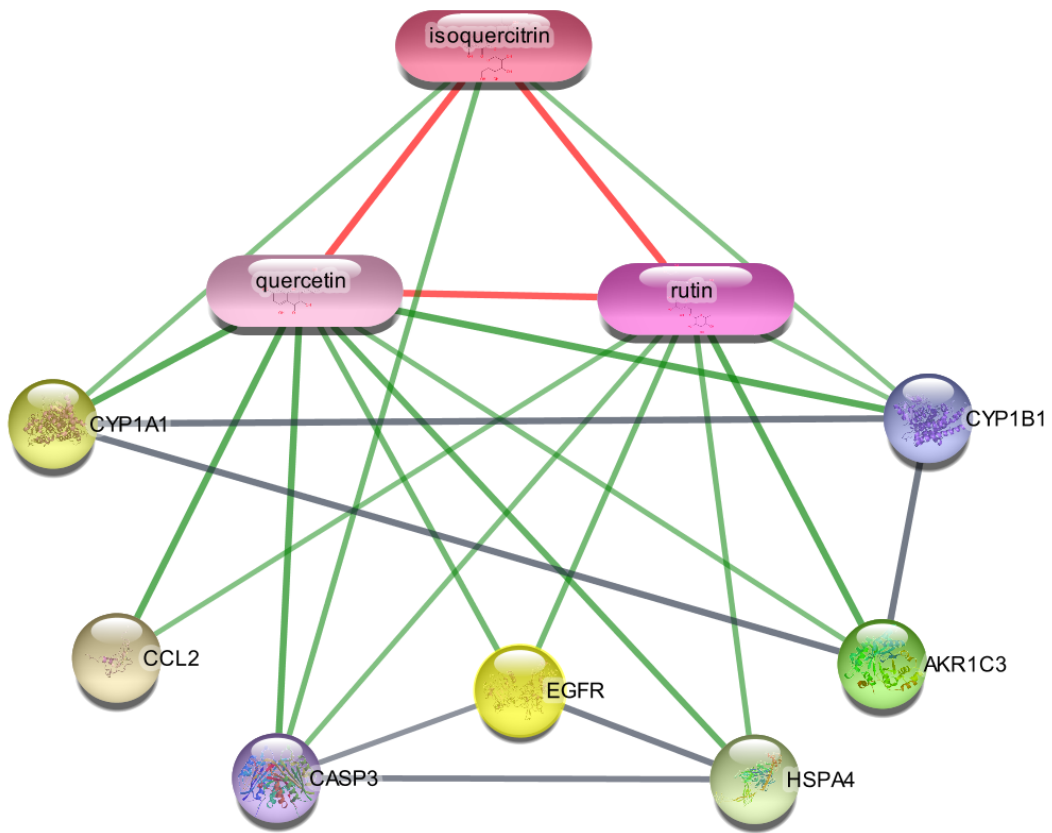

**Figure S1.** Interaction prediction of between Meniran compounds and proteins.

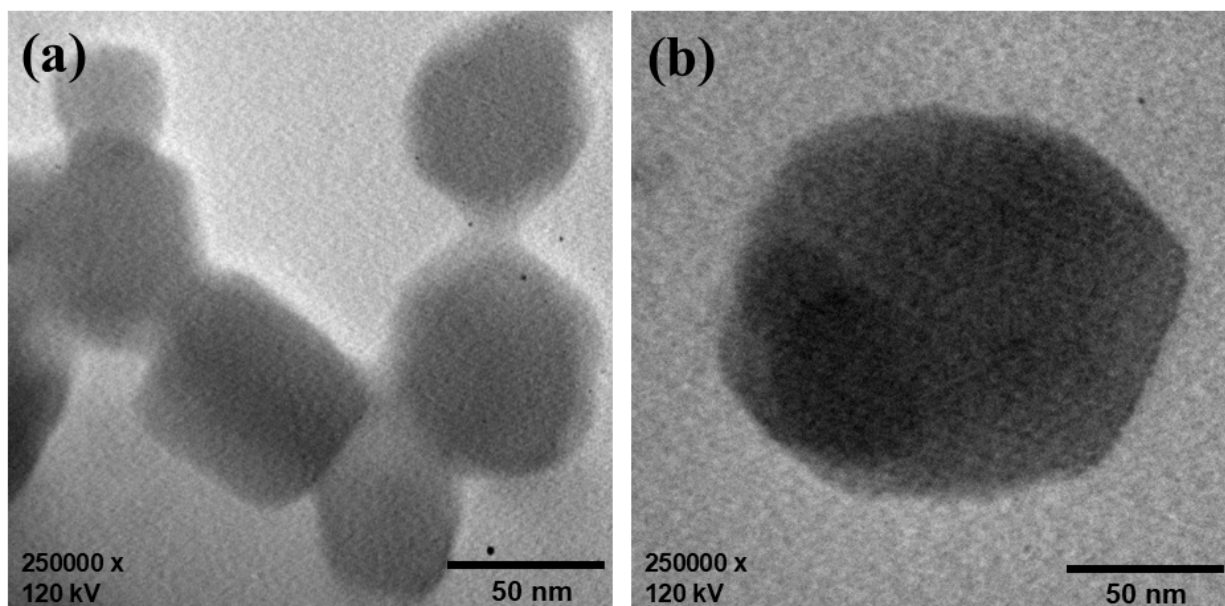

**Figure S2.** TEM bright field of (a) ZIF-8 nanoparticles, and (b) Meniran-incorporated ZIF-8 nanoparticles.

**Table S1.** Characteristics of active compound from Meniran.

| Name                     | Structure                                                                          | Formula                                         | Calc. MW  | RT [min] | Area (Max.)   | mzClou<br>ud<br>Best<br>Match |
|--------------------------|------------------------------------------------------------------------------------|-------------------------------------------------|-----------|----------|---------------|-------------------------------|
| Quercetin                | 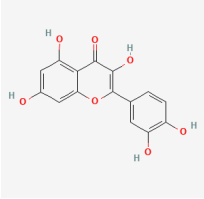  | C <sub>15</sub> H <sub>10</sub> O <sub>7</sub>  | 302.04061 | 23.525   | 10,266,492.12 | 92.7                          |
| Rutin                    |   | C <sub>27</sub> H <sub>30</sub> O <sub>16</sub> | 610.15007 | 23.523   | 57,315,267.66 | 92.6                          |
| Quercetin-3β-D-glucoside |  | C <sub>21</sub> H <sub>20</sub> O <sub>12</sub> | 464.09319 | 23.803   | 8,823,643.46  | 91.1                          |

**Table S2.** Drug-loading content (DLC) and drug-loading efficiency (DLE) of Meniran-incorporated ZIF-8 nanoparticles

| <b>Meniran/ZIF-8</b> | <b>Meniran/ZIF-8<br/>(weight ratio)</b> | <b>DLC ± SD<br/>(%)</b> | <b>DLE ± SD (%)</b> |
|----------------------|-----------------------------------------|-------------------------|---------------------|
|                      | 1 : 1                                   | 2.45 ± 0.71             | 17.11 ± 1.09        |
| <b>Meniran/ZIF-8</b> | 1.5 : 1                                 | 4.39 ± 0.53             | 15.64 ± 1.98        |
|                      | 2 : 1                                   | 5.01 ± 0.85             | 11.05 ± 1.28        |

**Table S3.** Binding affinity between compounds and AKT-1 or MDM2.

| <b>Ligand</b> | <b>Binding Affinity (kcal/mol)</b> |             |             |
|---------------|------------------------------------|-------------|-------------|
|               | <b>AKT-1</b>                       | <b>MDM2</b> | <b>EGFR</b> |
| ZIF-8         | -10.8                              | -9.4        | -8.5        |
| Imidazole     |                                    | -9.6        |             |
| AZD5363       | -9.1                               |             |             |
| MTX-531       |                                    |             | -8.2        |
